# Supplementary figures and images for: Electronic structure study of lightly Nb-doped TiO2 electrode for dye-sensitized solar cells
Source: Royal Society of Chemistry journal article supplement (doi:10.1039/c0ee00678e), 2011-01-01

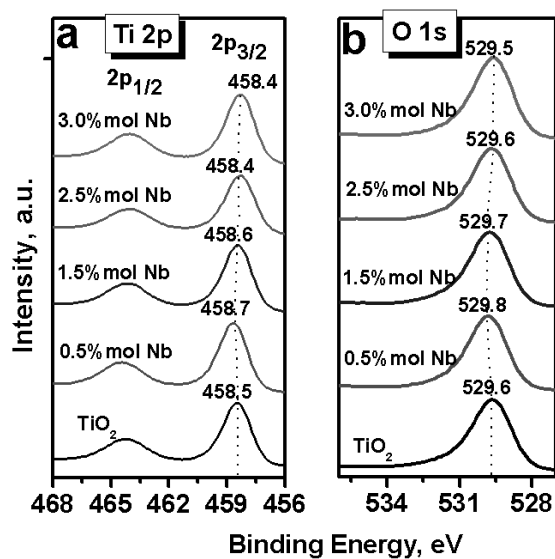

**Figure S1.** XPS spectra of the (a) Ti 2p and (b) O 1s core level of undoped and Nb-doped TiO<sub>2</sub>

Supplement: c0ee00678e.pdf [file c0ee00678e.pdf]
